# Supplementary material
Source: PubMed Central journal article supplement (PMC3318660)
Supplement: supp_86.8.4169_FigS1-S5.pdf [file supp_86.8.4169_FigS1-S5.pdf]

1 **Campos et al. Supplemental Figures & Legends**

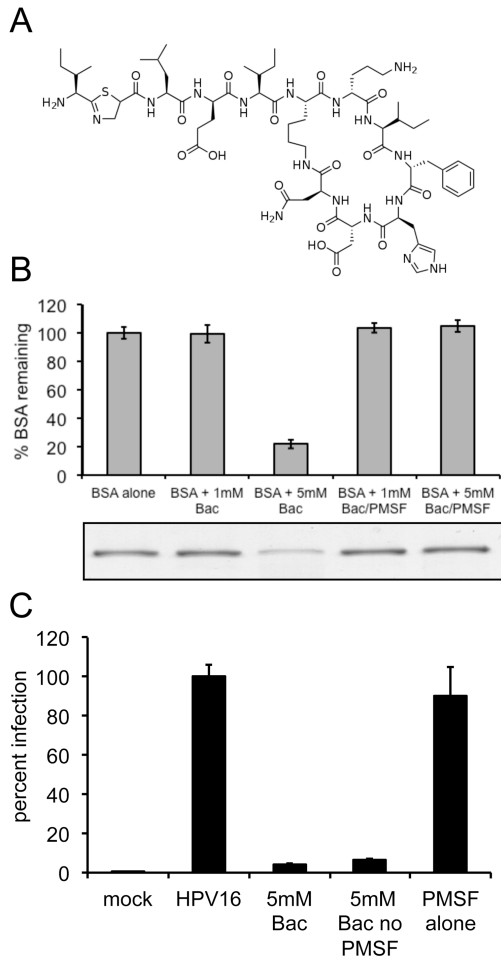

2

3 **Supplemental Fig 1. Elimination of protease contaminant in commercial**

4 **bacitracin. (A)** Chemical structure of Bac A, the major form found in commercial

5 Bac preparations, MW = 1423 g/mol. **(B)** BSA proteolysis assay. Bac was treated

6 with PMSF as described in *materials and methods*, or simply dissolved at the

7 indicated concentrations in PBS. Bac solutions were mixed with 500 ng BSA and

8 incubated at 37°C for 8h prior to SDS-PAGE and Coomassie staining. **(C)** HaCaT

9 cells were infected with HPV16 alone or in the presence of 5 mM PMSF-

10 inactivated Bac, 5 mM Bac alone, or PMSF alone. Infection was measured at 48h

11 by luciferase assay, revealing no significant inhibition by PMSF alone.

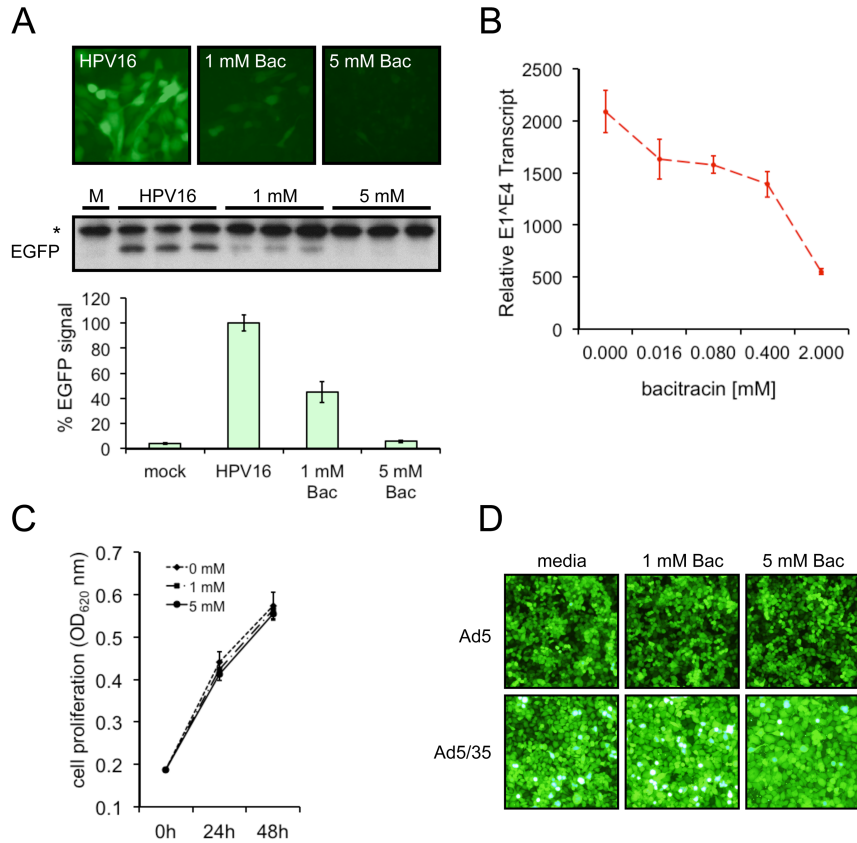

1

2 **Supplemental Fig 2. Bacitracin inhibits HPV16 but not adenovirus and is**

3 **not cytotoxic.** HaCaT cells were infected with HPV16 virions containing a GFP

4 reporter plasmid **(A)** or recircularized viral genome **(B)** in the presence of various

5 amounts of Bac. **(A)** Fluorescence micrograph of infected cells and western blot

6 of whole cell lysates showing GFP expression levels. Asterisk denotes a non-

7 specific band. GFP bands were quantified by densitometry and plotted in the

8 graph. **(B)** Viral E1<sup>E4</sup> mRNA transcript levels were measured 48h post infection

9 by RT-qPCR. **(C)** Cytotoxicity assay, HaCaT cells were grown in media ± Bac

10 and cell proliferation was quantified by MTT assay. **(D)** HeLa cells were infected

11 with either Ad5-GFP or Ad5/35-GFP at 500 VP/cell ± Bac. Fluorescence

12 micrographs were taken 48h post-infection.

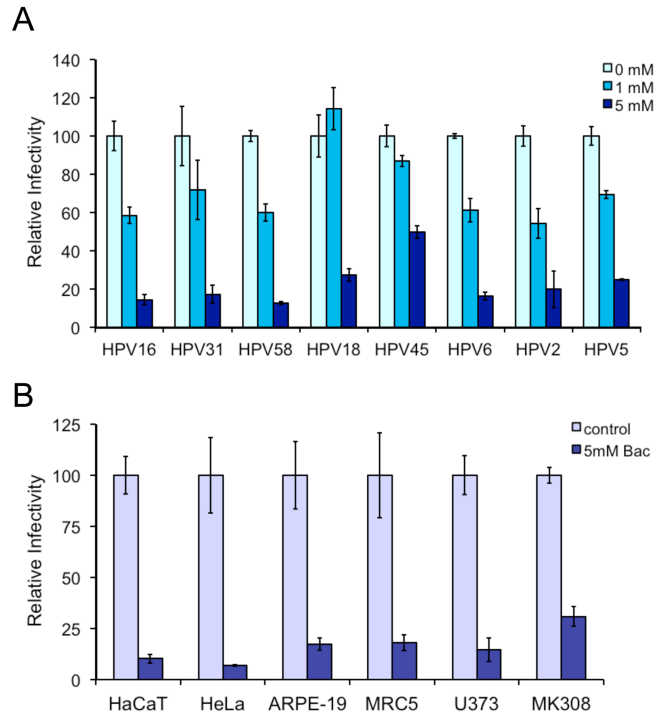

1

2 **Supplemental Fig 3. Bacitracin inhibition of multiple HPV and cell types. (A)**

3 HaCaT cells were infected with the indicated HPV type (luciferase-expressing

4 reporter virions) in media  $\pm$  Bac. **(B)** Indicated cell types were infected with

5 HPV16 in media  $\pm$  Bac. Infection was measured at 48h by luciferase assay for

6 both panels.

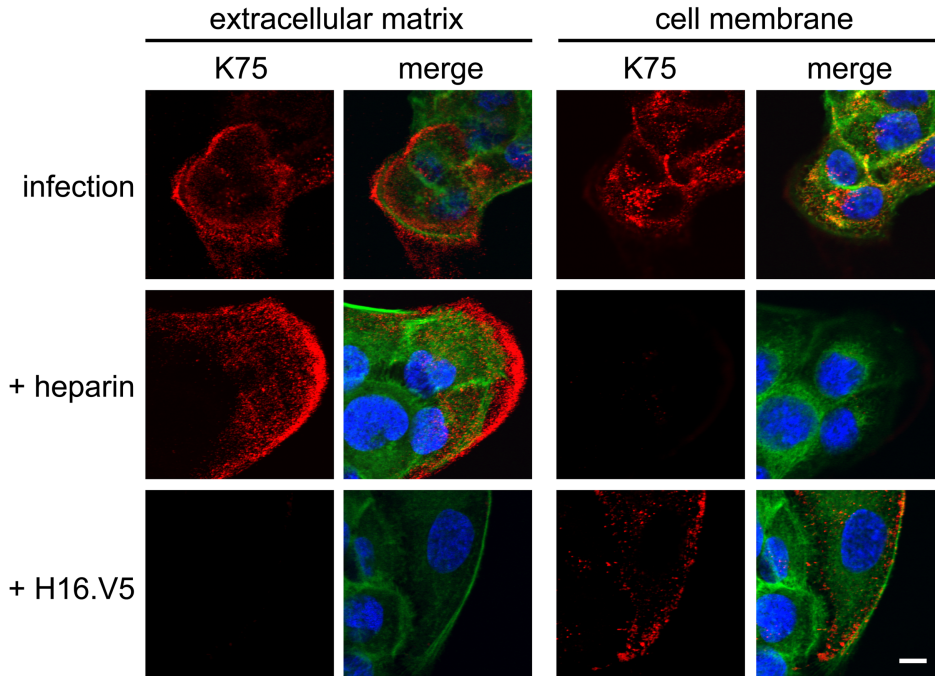

1

2 **Supplemental Fig 4. Neutralization in the presence of bacitracin.** HaCaT  
3 cells were infected with HPV16 alone or with neutralizing amounts of heparin or  
4 H16.V5 monoclonal antibody, in media plus 5 mM Bac. Infection proceeded for  
5 4h prior to fixation and IF and as described in *materials and methods*. L1 was  
6 stained with the rabbit polyclonal K75 and AF555 anti-rabbit (red). Actin was  
7 stained with AF488-phalloidin (green). Nuclei were stained with DAPI. Two  
8 different optical planes (extracellular matrix and cell membrane) of the same cell  
9 clusters are shown for each infection. Scale bar = 10  $\mu$ m.

10

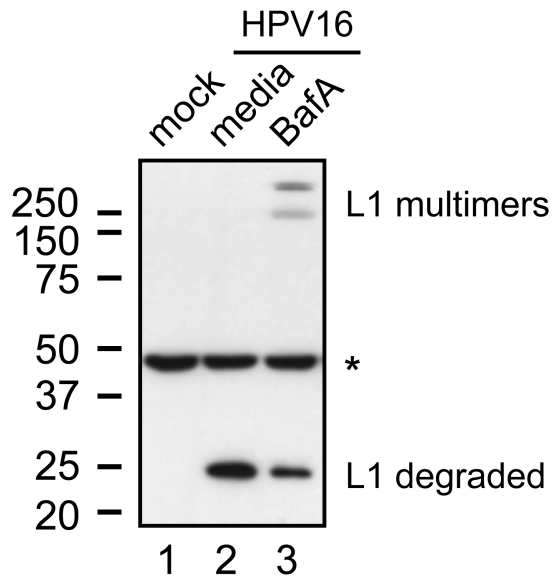

1

2 **Supplemental Fig 5. L1 degradation is reduced but not eliminated in the**  
 3 **presence of BafA.** HaCaT cells were mock infected (lane 1) or pre-bound with  
 4 virus and infected for 7h in media alone (lane 2) or media plus 32 nM BafA (lane  
 5 3) prior to trypsinization and processing for non-reducing SDS-PAGE and  
 6 western blot for L1. Molecular masses (kDa) are shown to the left and positions  
 7 of the L1 forms are denoted on the right. The asterisk again denotes the non-  
 8 specific band seen with anti-L1 ab30908.

9

10

11
